# Supplementary material for: The response and recovery of the Arabidopsis thaliana transcriptome to phosphate starvation
Source: PubMed Central journal article supplement (PMC3520718; doi:10.1186/1471-2229-12-62), 2012-05-03
Supplement: 1471-2229-12-62-S3.pdf [file 1471-2229-12-62-S3.pdf]

# AGI Locus KEY:

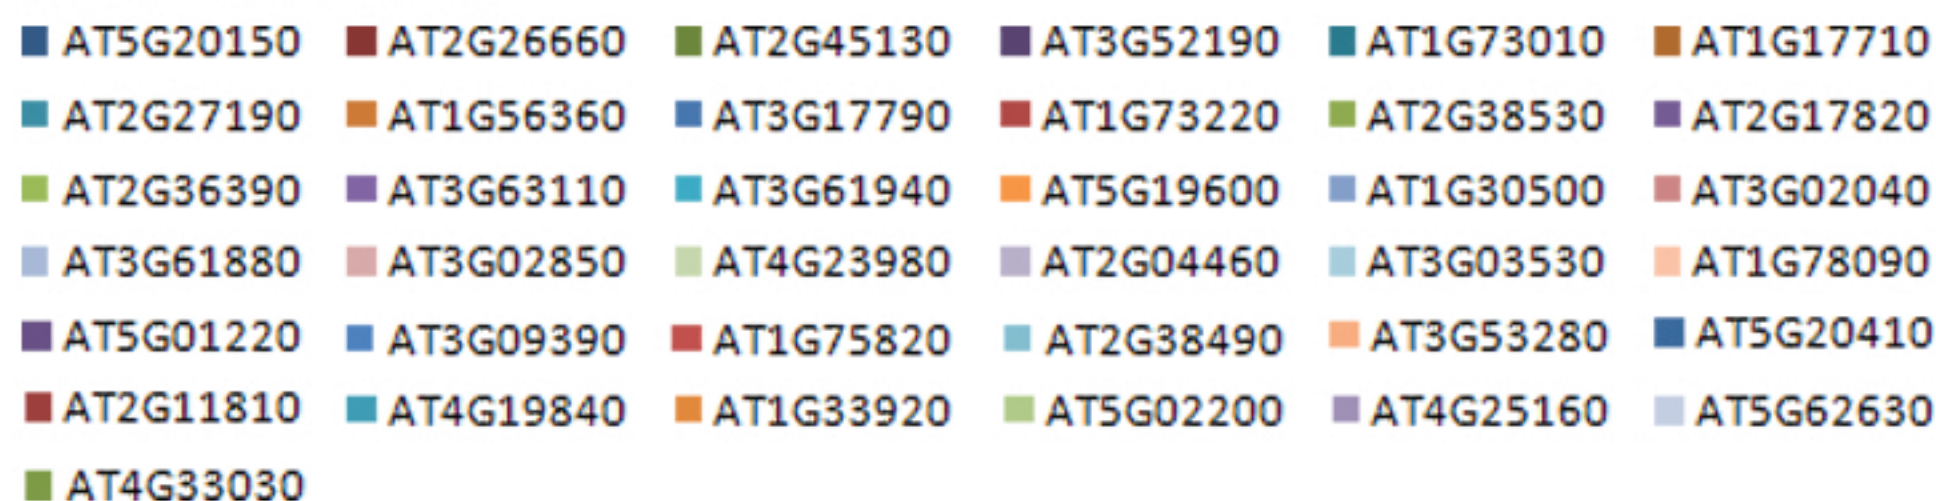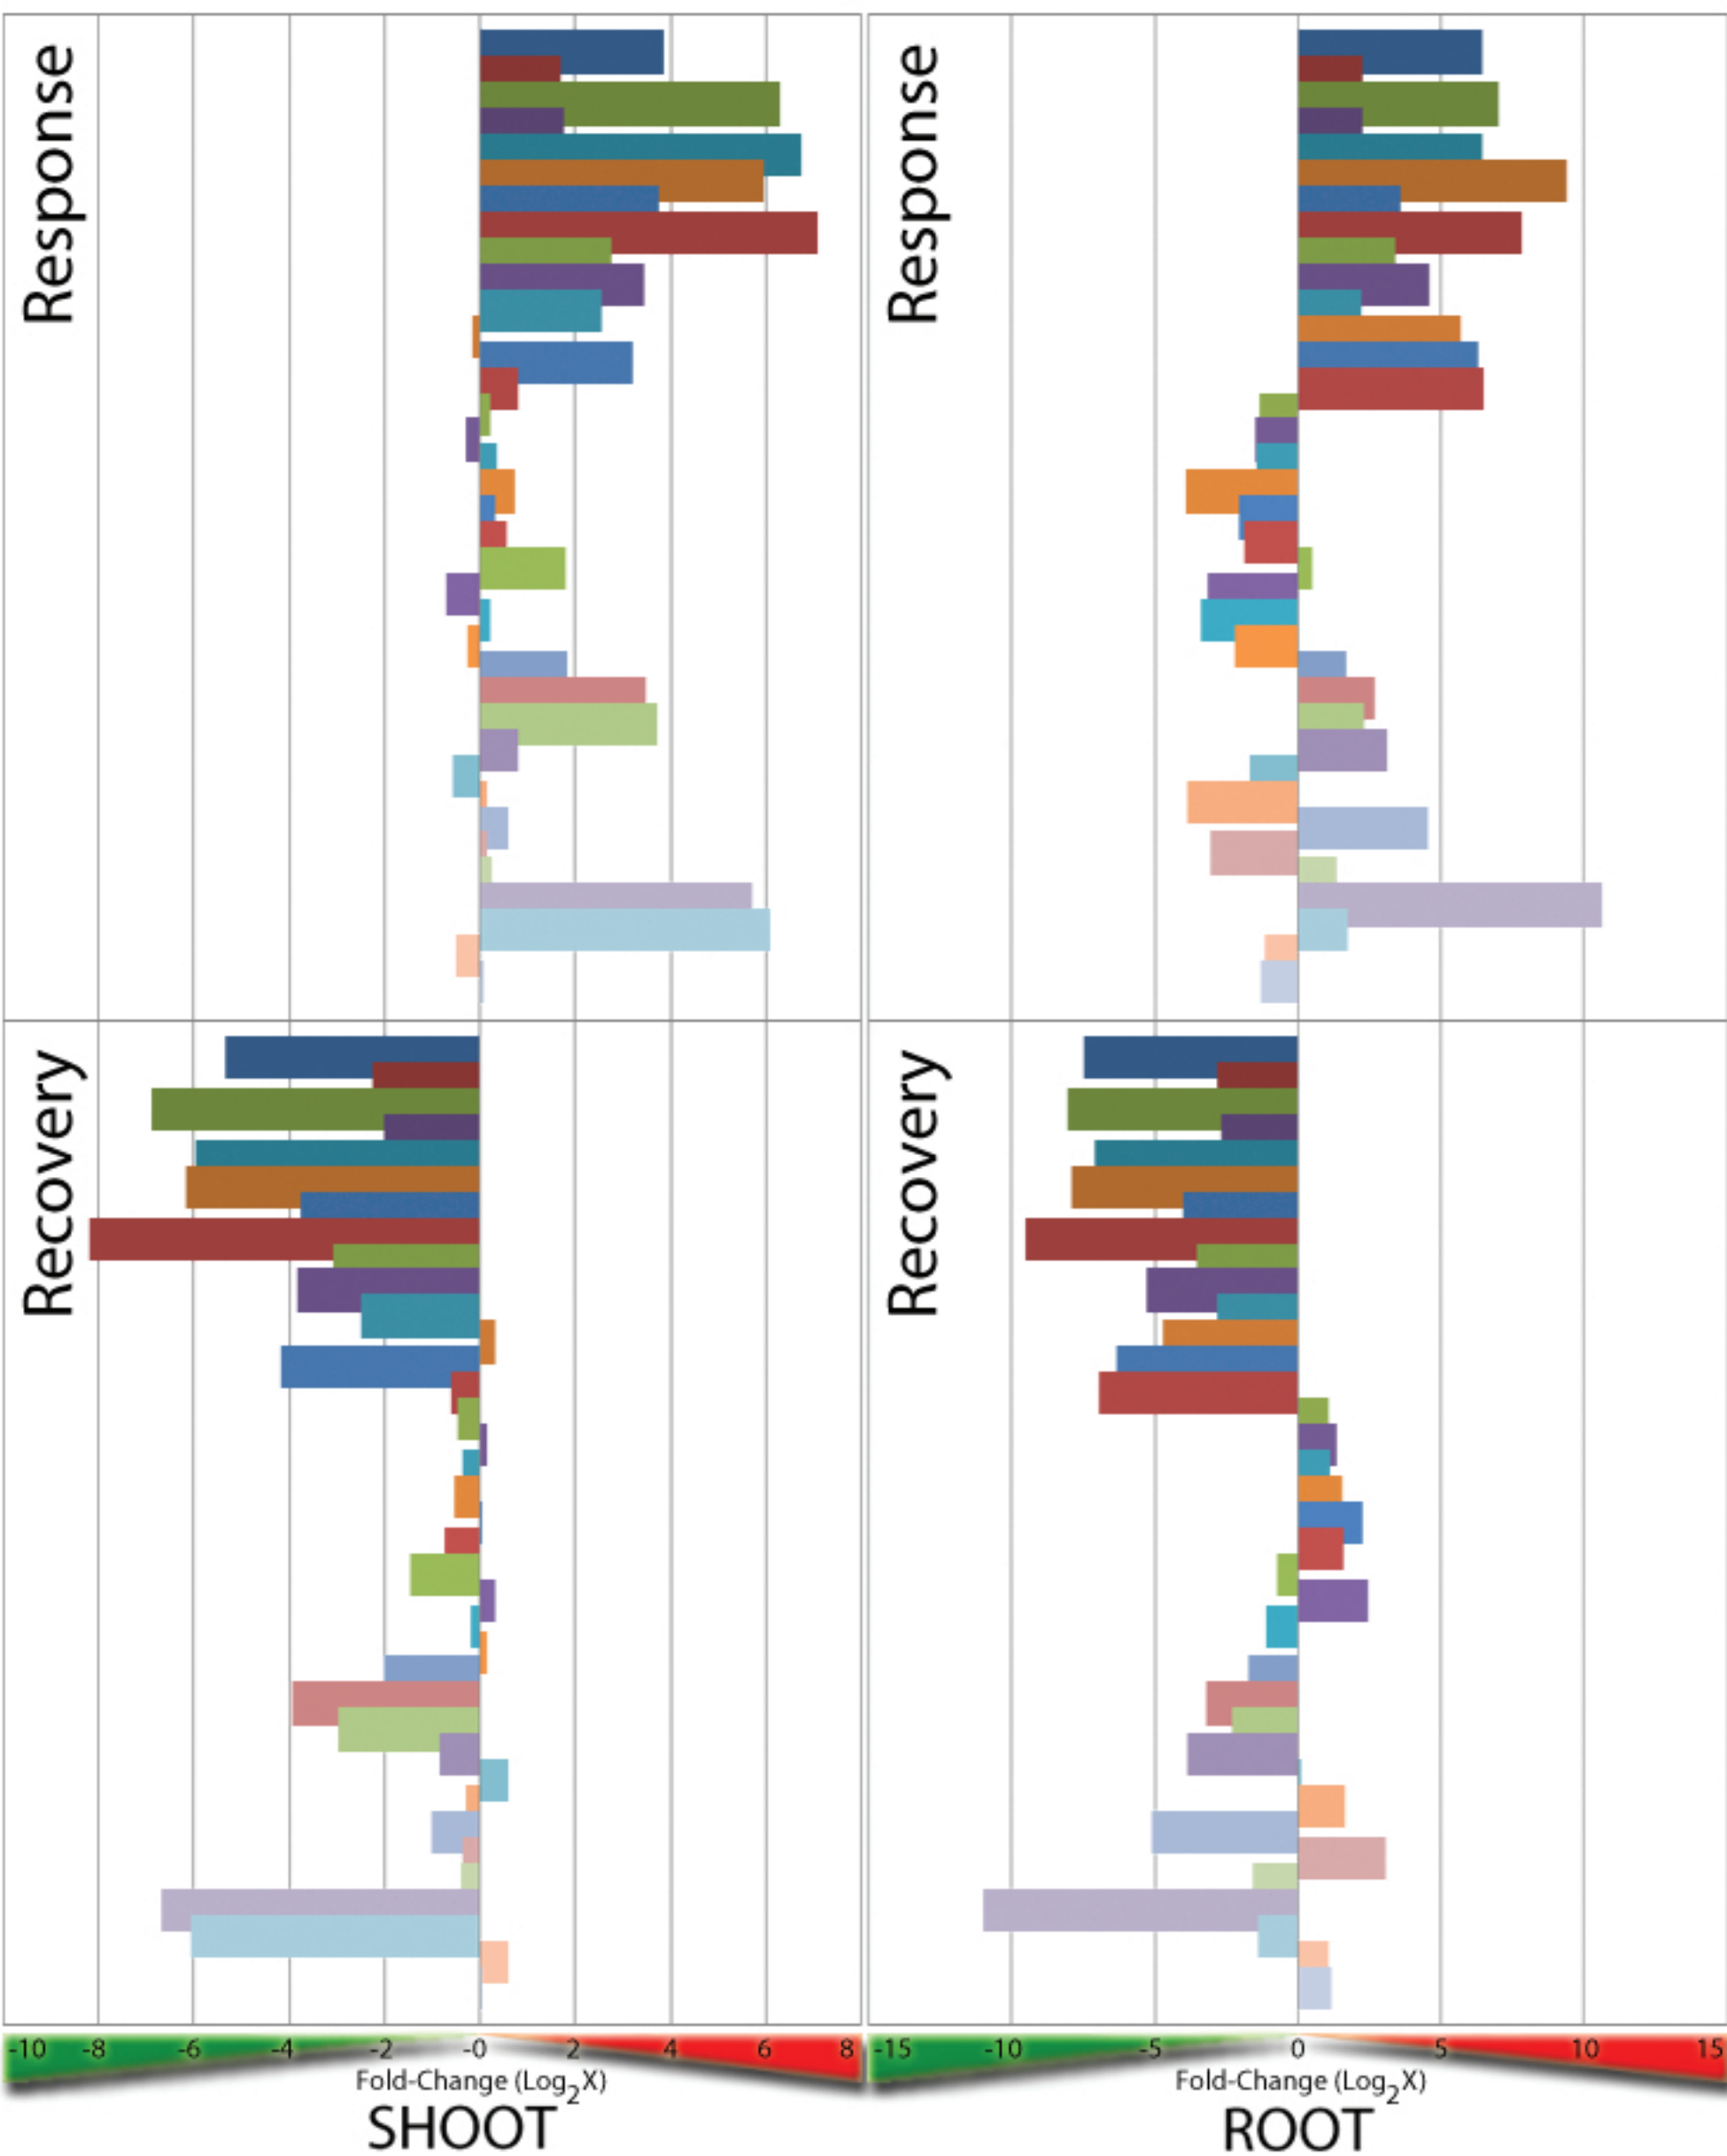

Supp. Figure: qPCR Results confirming 37 loci selected from the top differentially expressed genes known to respond to P<sub>i</sub> starvation
